# Supplementary material for: First Identification of 12β-Deoxygonyautoxin 5 (12α-Gonyautoxinol 5) in the Cyanobacterium Dolichospermum circinale (TA04) and 12β-Deoxysaxitoxin (12α-Saxitoxinol) in D. circinale (TA04) and the Dinoflagellate Alexandrium pacificum (Group IV) (120518KureAC)
Source: MDPI journal article supplement (doi:10.3390/md20030166), 2022-02-25
Supplement: s1 [file s1]

## Supplementary Materials

### **First Identification of 12 $\beta$ -Deoxygonyautoxin 5 (12 $\alpha$ -Gonyautoxinol) in the Cyanobacterium *Dolichospermum Circinale* (TA04), and 12 $\beta$ -Deoxysaxitoxin (12 $\alpha$ -Saxitoxinol) in *D. Circinale* (TA04) and the Dinoflagellate *Alexandrium pacificum* (Group IV) (120518kureac)**

**Michiru Akamatsu<sup>1,†</sup>, Ryosuke Hirozumi<sup>1,†</sup>, Yuko Cho<sup>1</sup>, Yuta Kudo<sup>1,2</sup>, Keiichi Konoki<sup>1</sup>, Yasukatsu Oshima<sup>3,‡</sup> and Mari Yotsu-Yamashita<sup>1,\*</sup>**

1 Graduate School of Agricultural Science, Tohoku University, Sendai 980-8572, Japan;

mg\_rbbs9\_0130@icloud.com (M.A.); ryosuke.hirozumi.t2@dc.tohoku.ac.jp (R.H.);

yuko.cho.a4@tohoku.ac.jp (Y.C.); yuta.kudo.d5@tohoku.ac.jp (Y.K.); keiichi.konoki.b2@tohoku.ac.jp (K.K.)

2 Frontier Research Institute for Interdisciplinary Sciences, Tohoku University, Sendai 980-8578, Japan

3 Graduate School of Life Sciences, Tohoku University, Sendai 980-8577, Japan; oshima.y3@gmail.com

\* Correspondence: mari.yamashita.c1@tohoku.ac.jp; Tel.: +81-22-757-4425

† These authors contributed equally to this work.

‡ Professor emeritus.

Figure S1. The ESI-HRMS spectrum of synthetic 12 $\beta$ -deoxyGTX5 (**2**).

Figure S2. The ESI-HRMS spectrum of synthetic 12 $\beta$ -deoxySTX (**3**).

Figure S3. The ESI-HRMS spectrum of synthetic 12 $\alpha$ -deoxyGTX5 (**5**).

Figure S4. The COSY spectrum of synthetic 12 $\beta$ -deoxyGTX5 (**2**).

Figure S5. The COSY spectrum of synthetic 12 $\beta$ -deoxySTX (**3**).

Figure S6. The <sup>1</sup>H NMR spectrum of synthetic 12 $\alpha$ -deoxyGTX5 (**5**).

Figure S7. The COSY spectrum of synthetic 12 $\alpha$ -deoxyGTX5 (**5**).

Figure S8. The TOCSY spectrum of synthetic 12 $\alpha$ -deoxyGTX5 (**5**).

Figure S9. The NOESY1D spectrum of synthetic 12 $\beta$ -deoxyGTX5 (**2**).

Figure S10. The NOESY1D spectrum of synthetic 12 $\beta$ -deoxySTX (**3**).

Figure S11. The ESI-HRMS spectrum of 12 $\beta$ -deoxyGTX5 (**2**) in *D. circinale* (TA04).

Figure S12. The ESI-HRMS spectrum of 12 $\beta$ -deoxySTX (**3**) ( $\alpha$ -saxitoxinol) in *D. circinale* (TA04).

Figure S13. The ESI-HRMS spectrum of 12 $\beta$ -deoxySTX (**3**) ( $\alpha$ -saxitoxinol) in *A. pacificum* (Group IV) (Kure AC).

Figure S14. The HR-RP-LCMS Q1 scan of the *D. circinale* (TA04) cell extract.

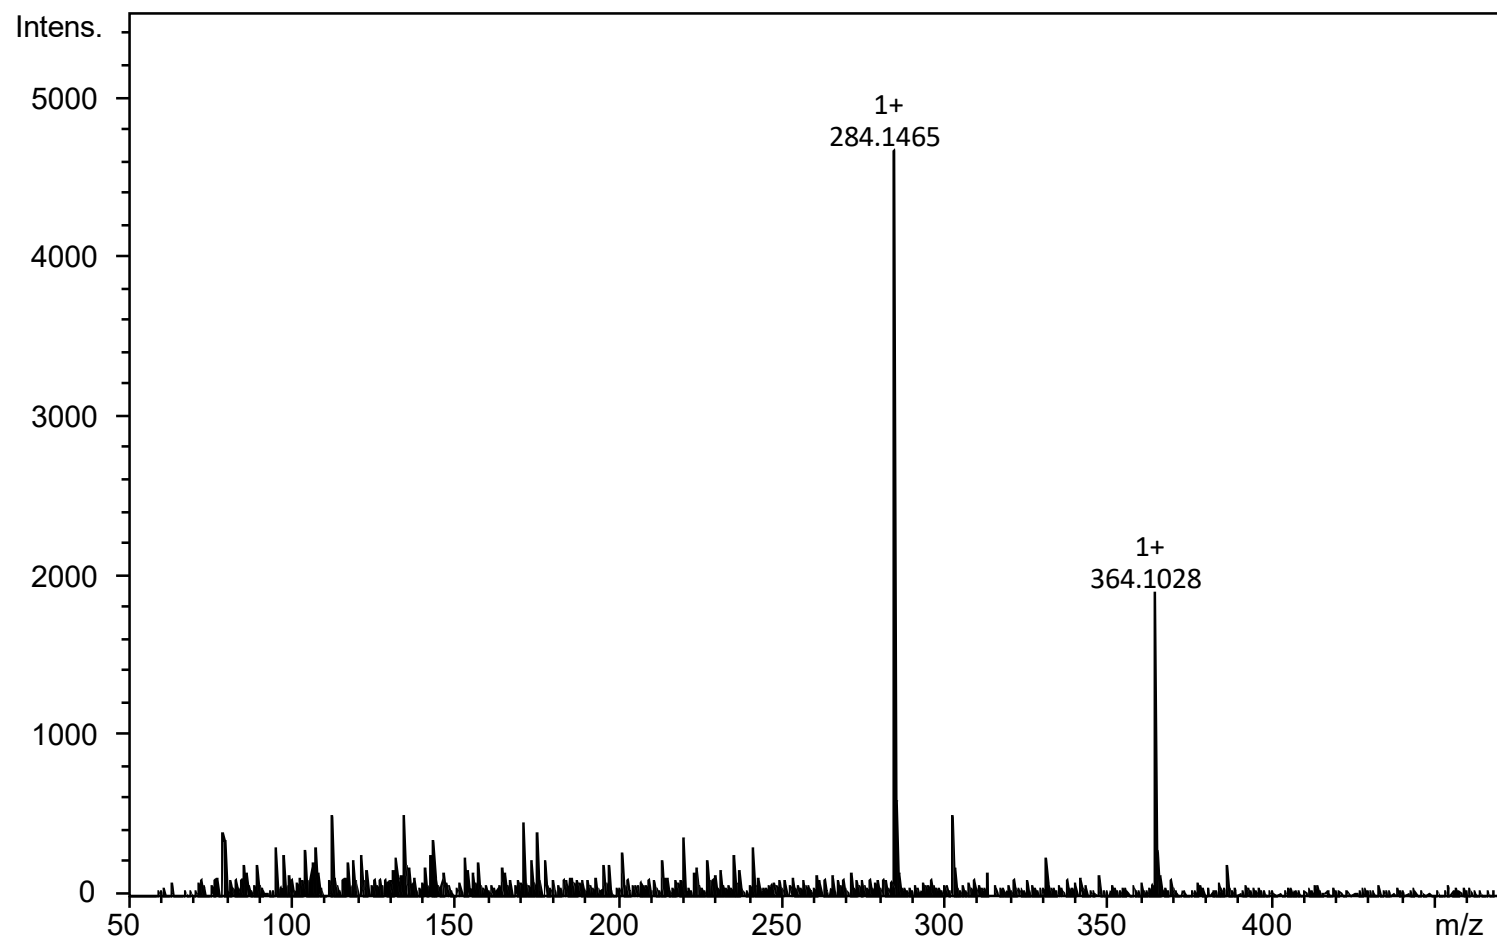

**Figure S1.** The ESI-HRMS spectrum of synthetic 12 $\beta$ -deoxyGTX5 (**2**).

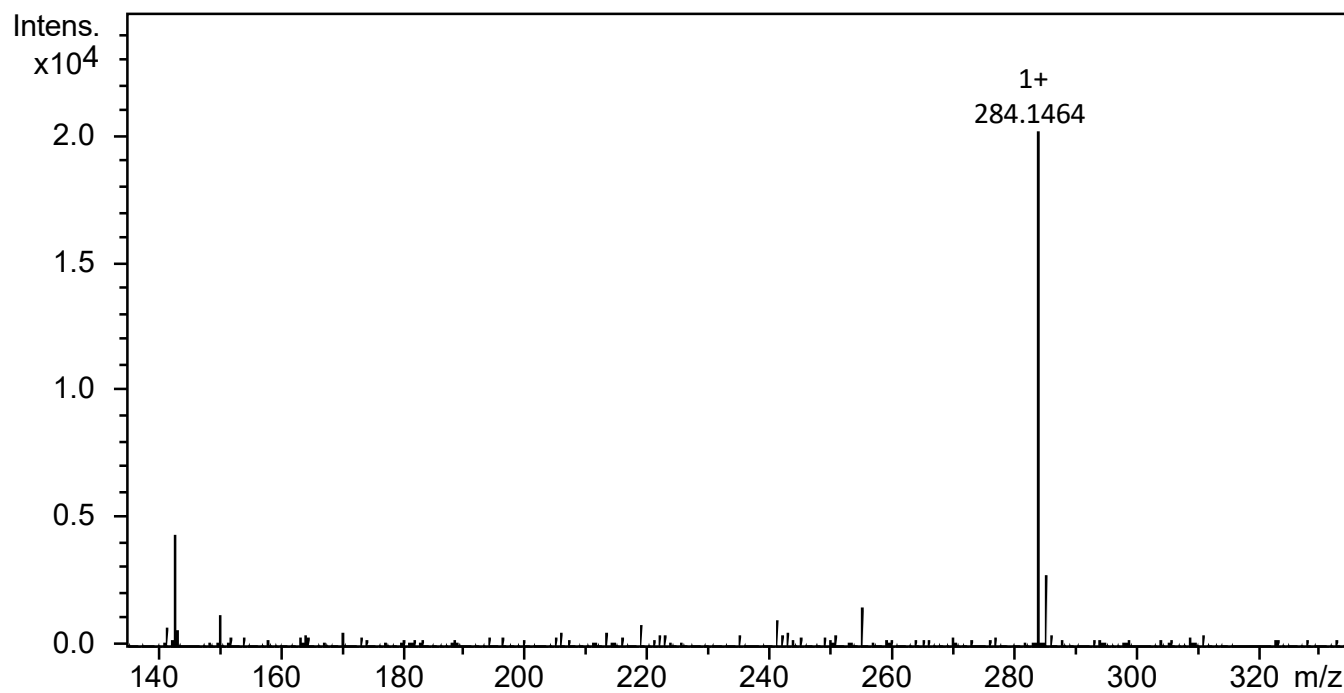

**Figure S2.** The ESI-HRMS spectrum of synthetic 12 $\beta$ -deoxySTX (**3**).

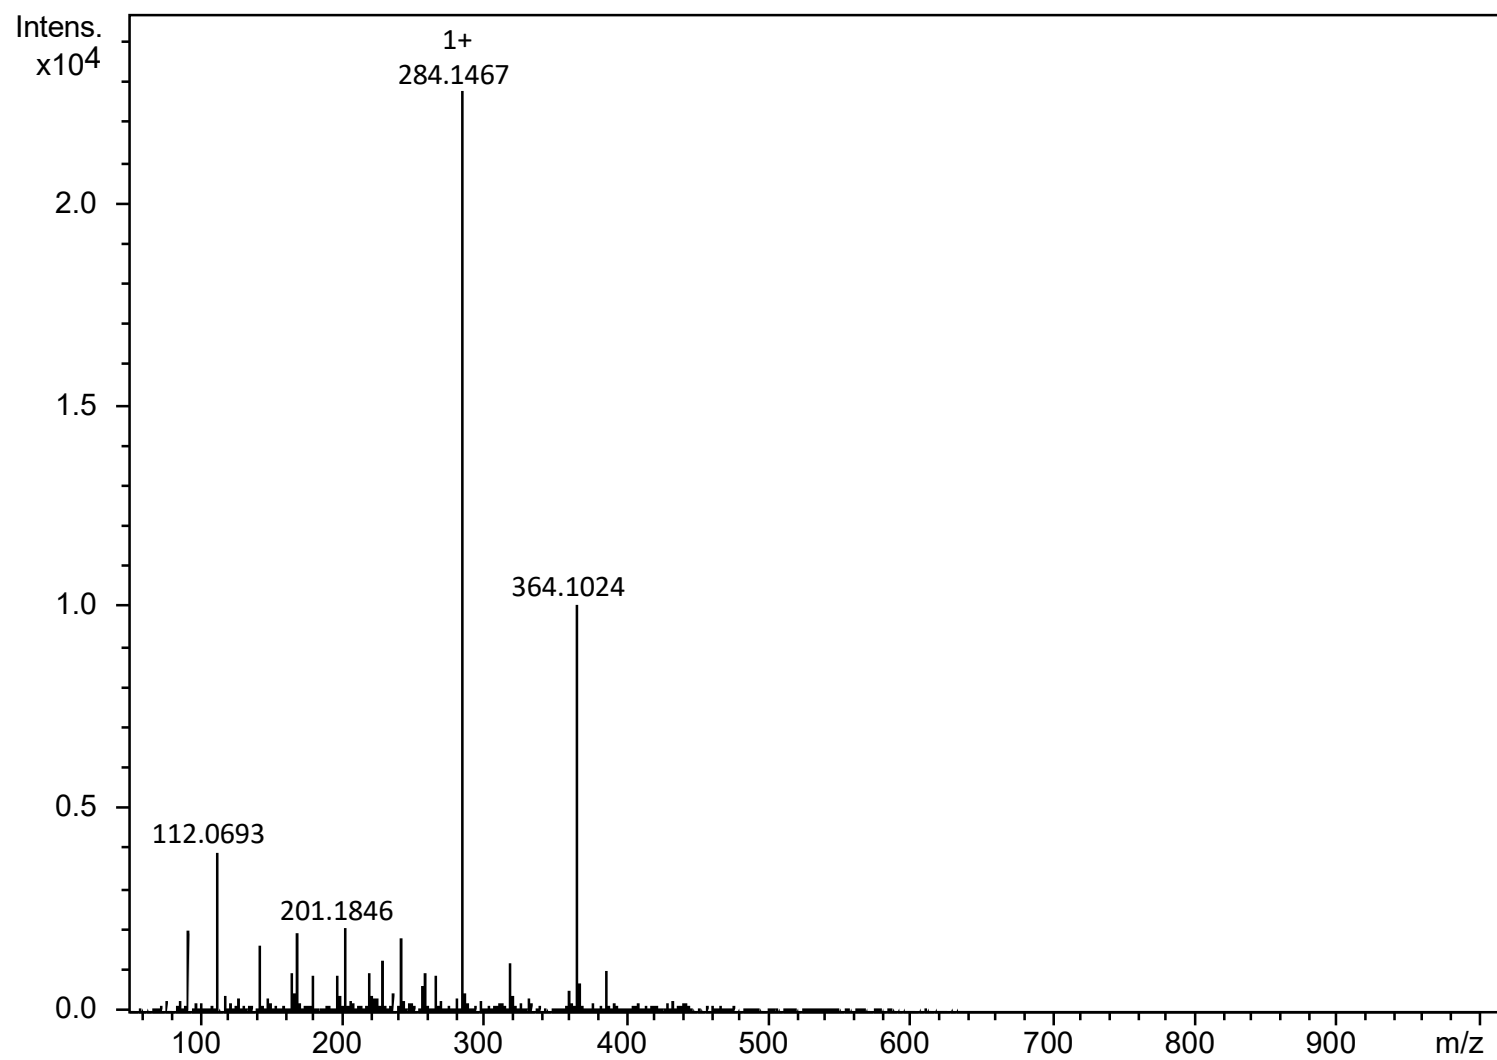

**Figure S3.** The ESI-HRMS spectrum of synthetic 12 $\alpha$ -deoxyGTX5 (**5**).

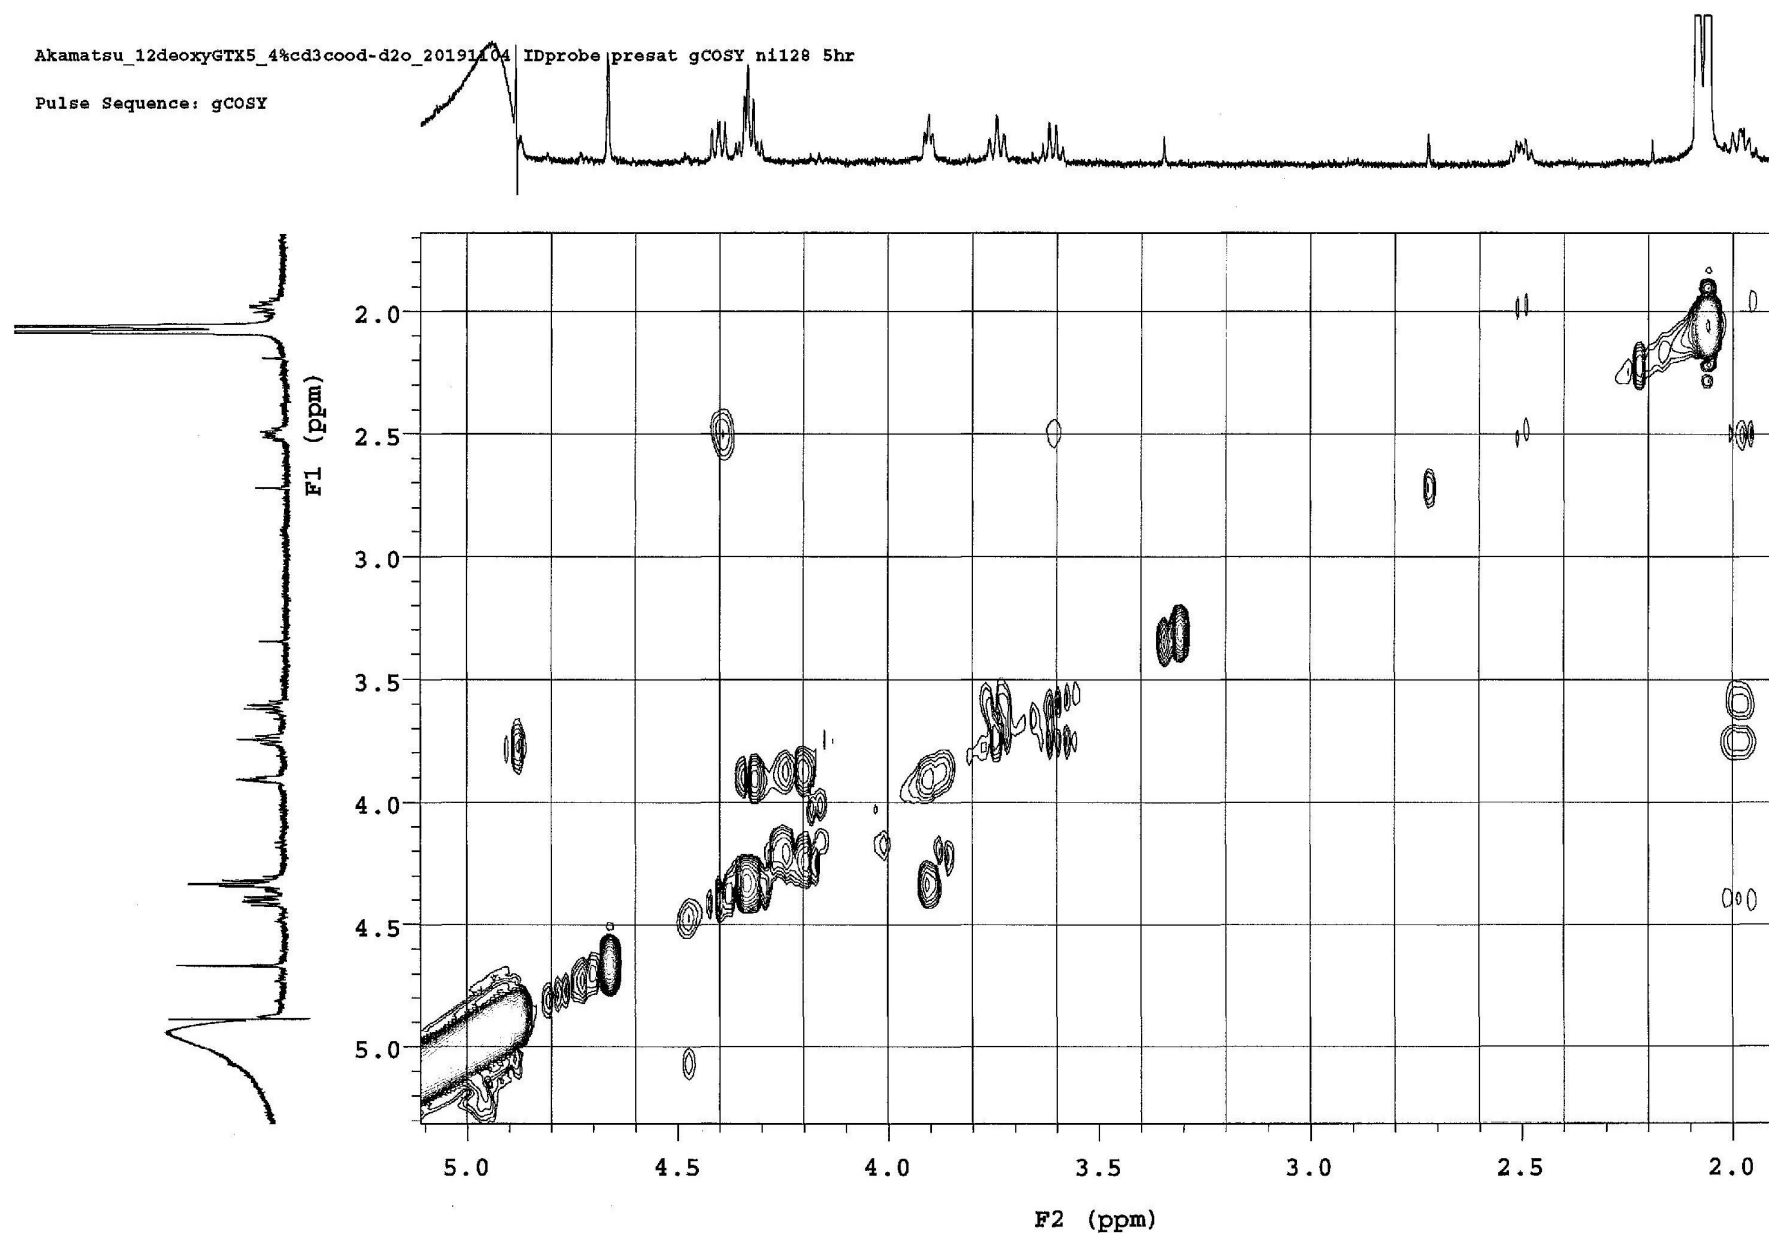

**Figure S4.** The COSY spectrum of synthetic 12 $\beta$ -deoxyGTX5 (**2**).  
(600 MHz, CD<sub>3</sub>COOD-D<sub>2</sub>O (4 : 96, v/v)).

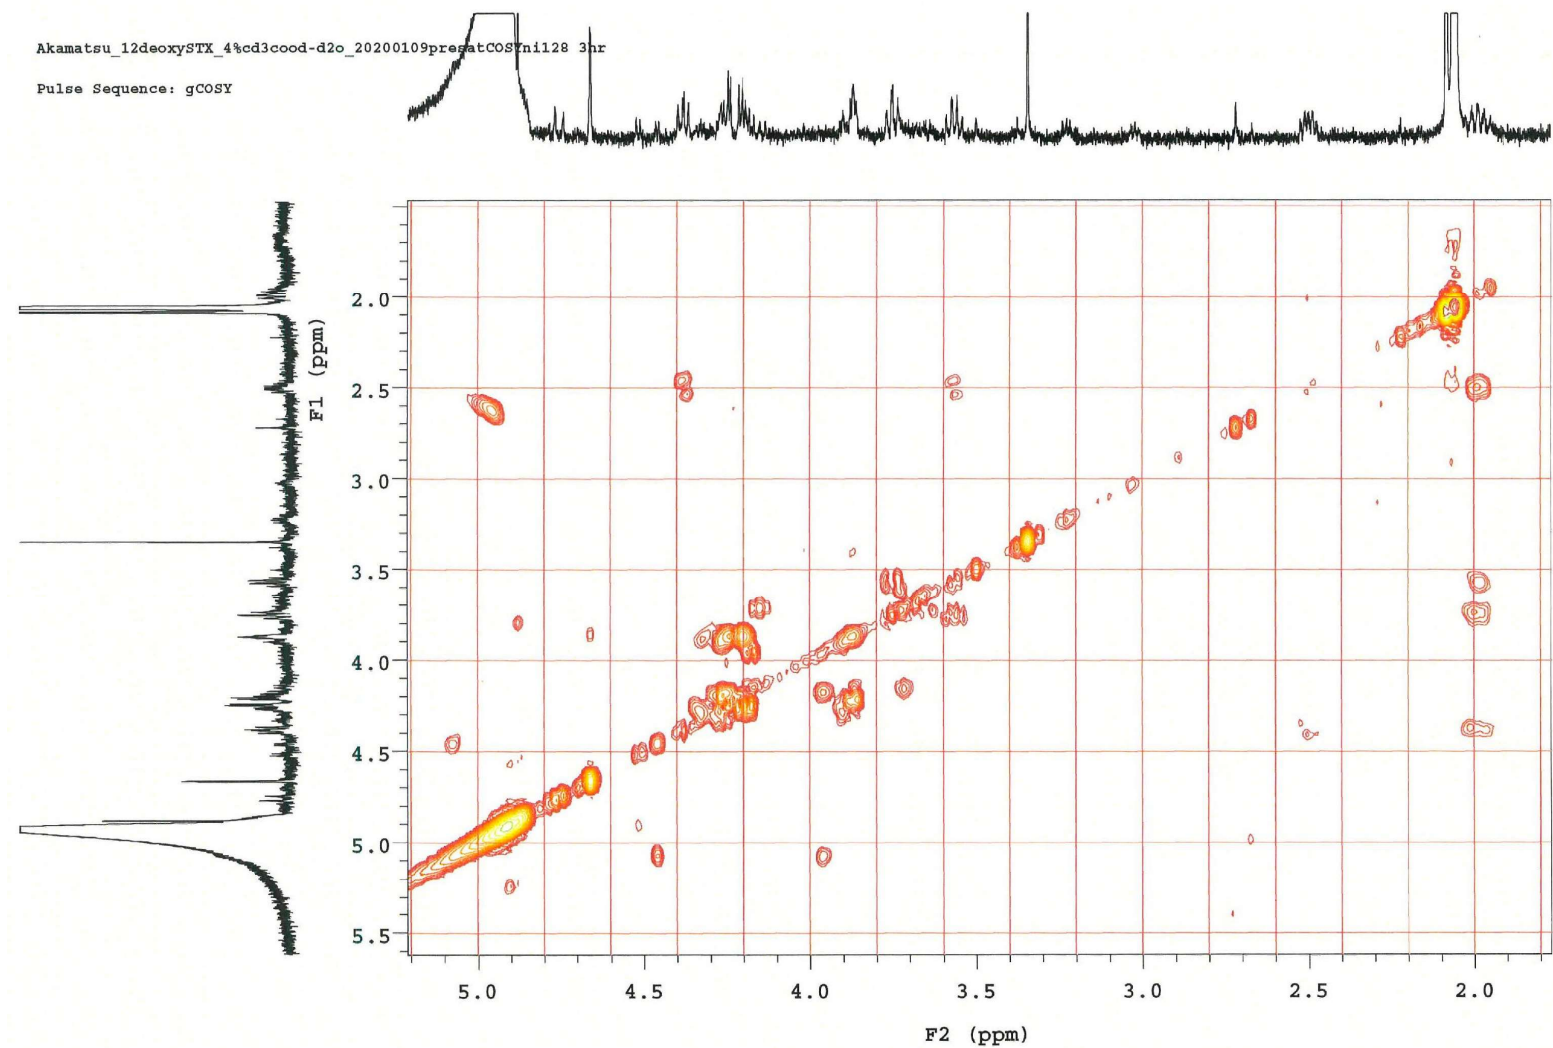

**Figure S5.** The COSY spectrum of synthetic 12 $\beta$ -deoxySTX (**3**). (600 MHz, CD<sub>3</sub>COOD-D<sub>2</sub>O (4 : 96, v/v)).

Hirozumi\_12alphaGTX5\_F18\_4%cd3cood-d2o\_microbottomtube\_20220211\_presatscan100

Pulse Sequence: PRESAT

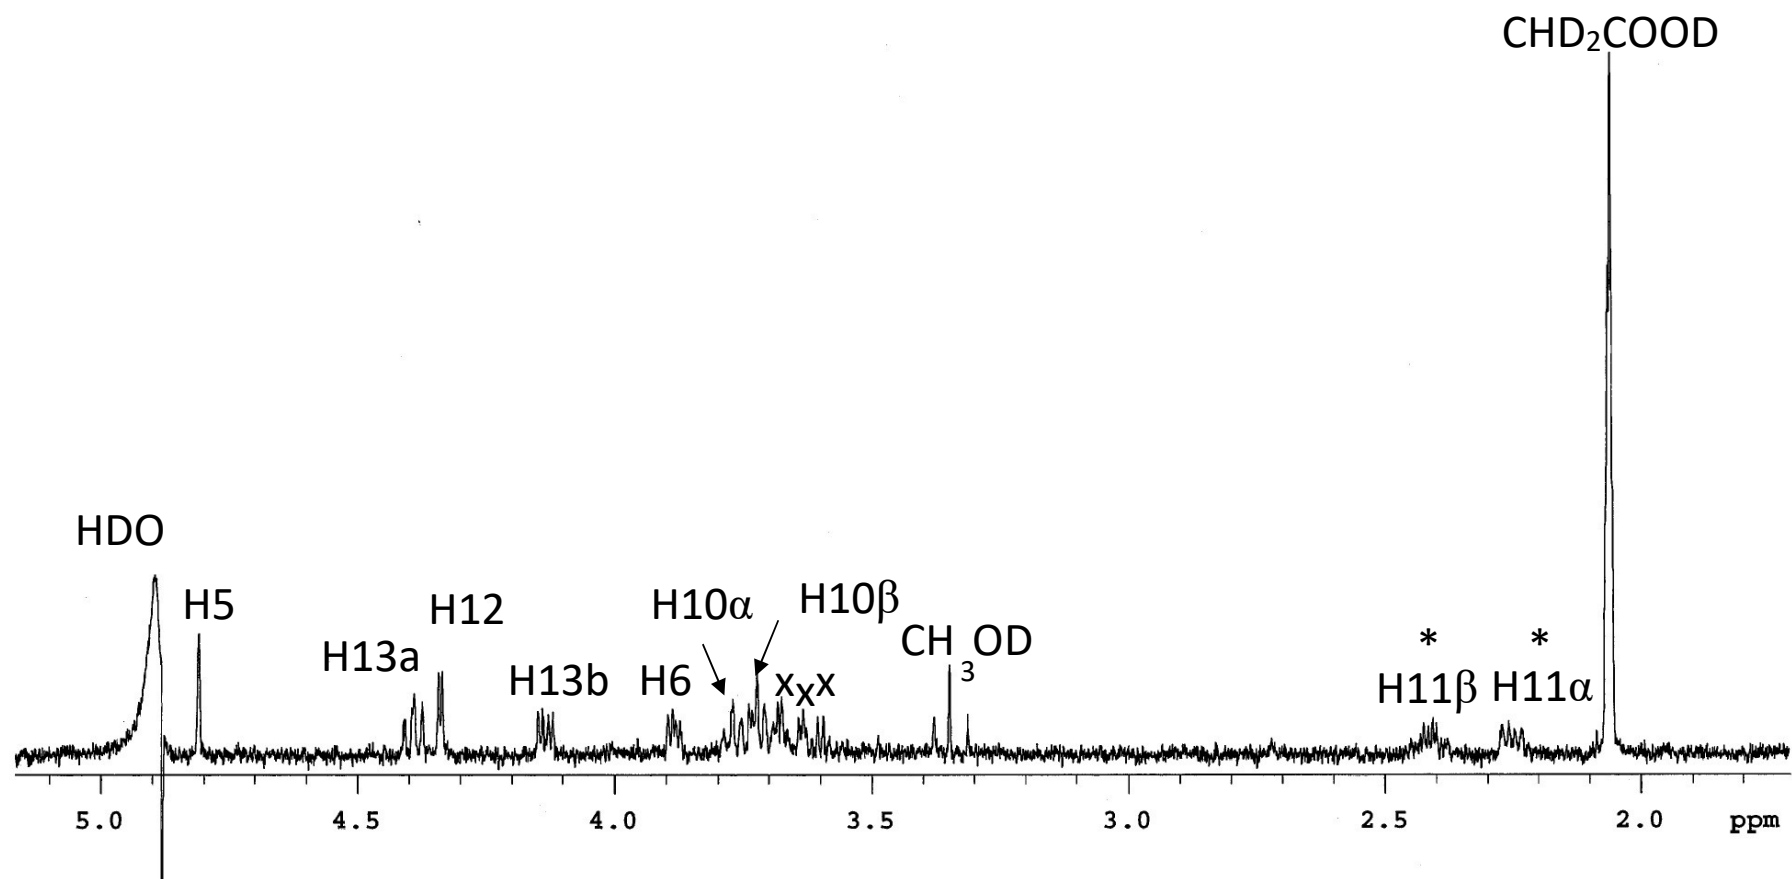

**Figure S6.** The  $^1\text{H}$  NMR spectrum of synthetic 12 $\alpha$ -deoxyGTX5 (**5**). (600 MHz, microbottom tube,  $\text{CD}_3\text{COOD-D}_2\text{O}$  (4 : 96, v/v). HDO was presaturated.)  
\* interchangeable assignment.



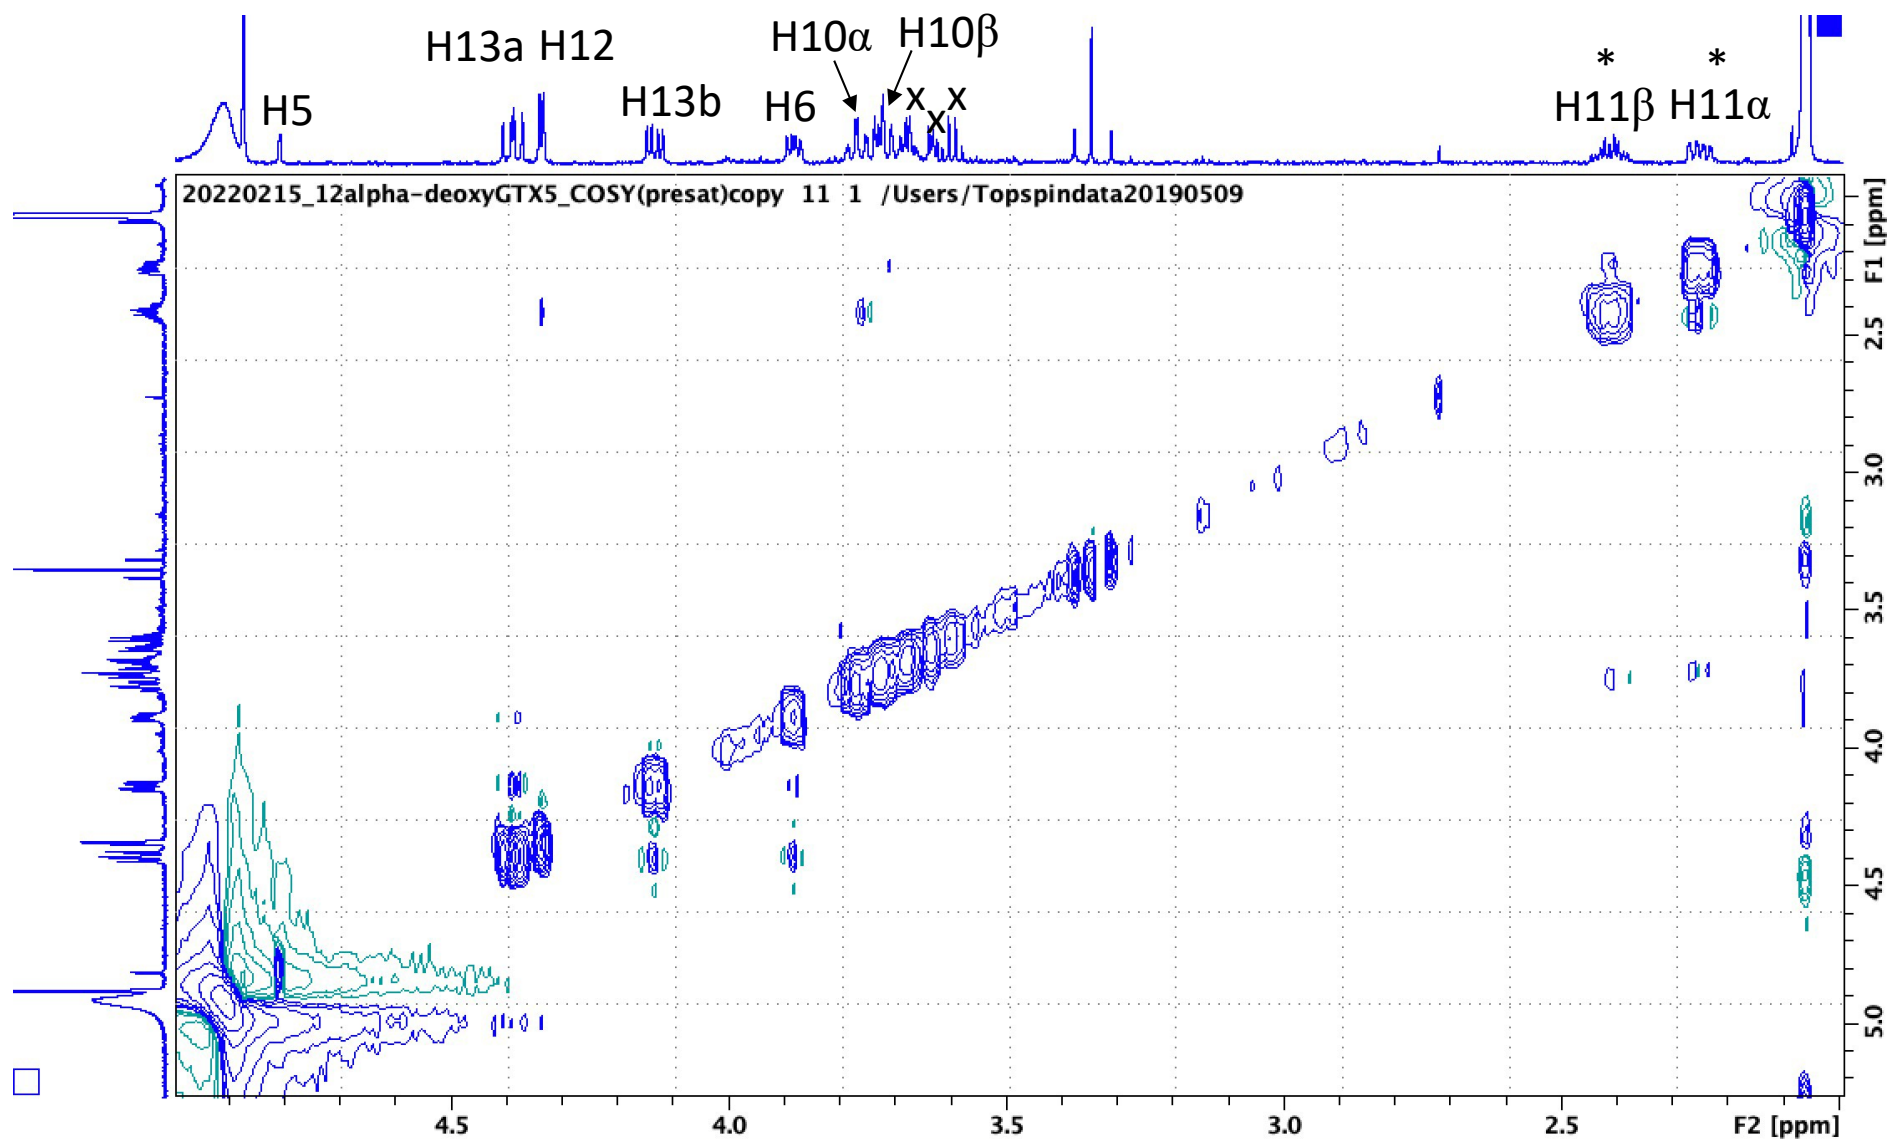

**Figure S7.** The COSY spectrum of synthetic 12 $\alpha$ -deoxyGTX5 (**5**). (600 MHz, microbottom tube, CD<sub>3</sub>COOD-D<sub>2</sub>O (4 : 96, v/v). HDO was presaturated. 1 h, Cryoprobe, Bruker AVANCE III), \* interchangeable assignment.

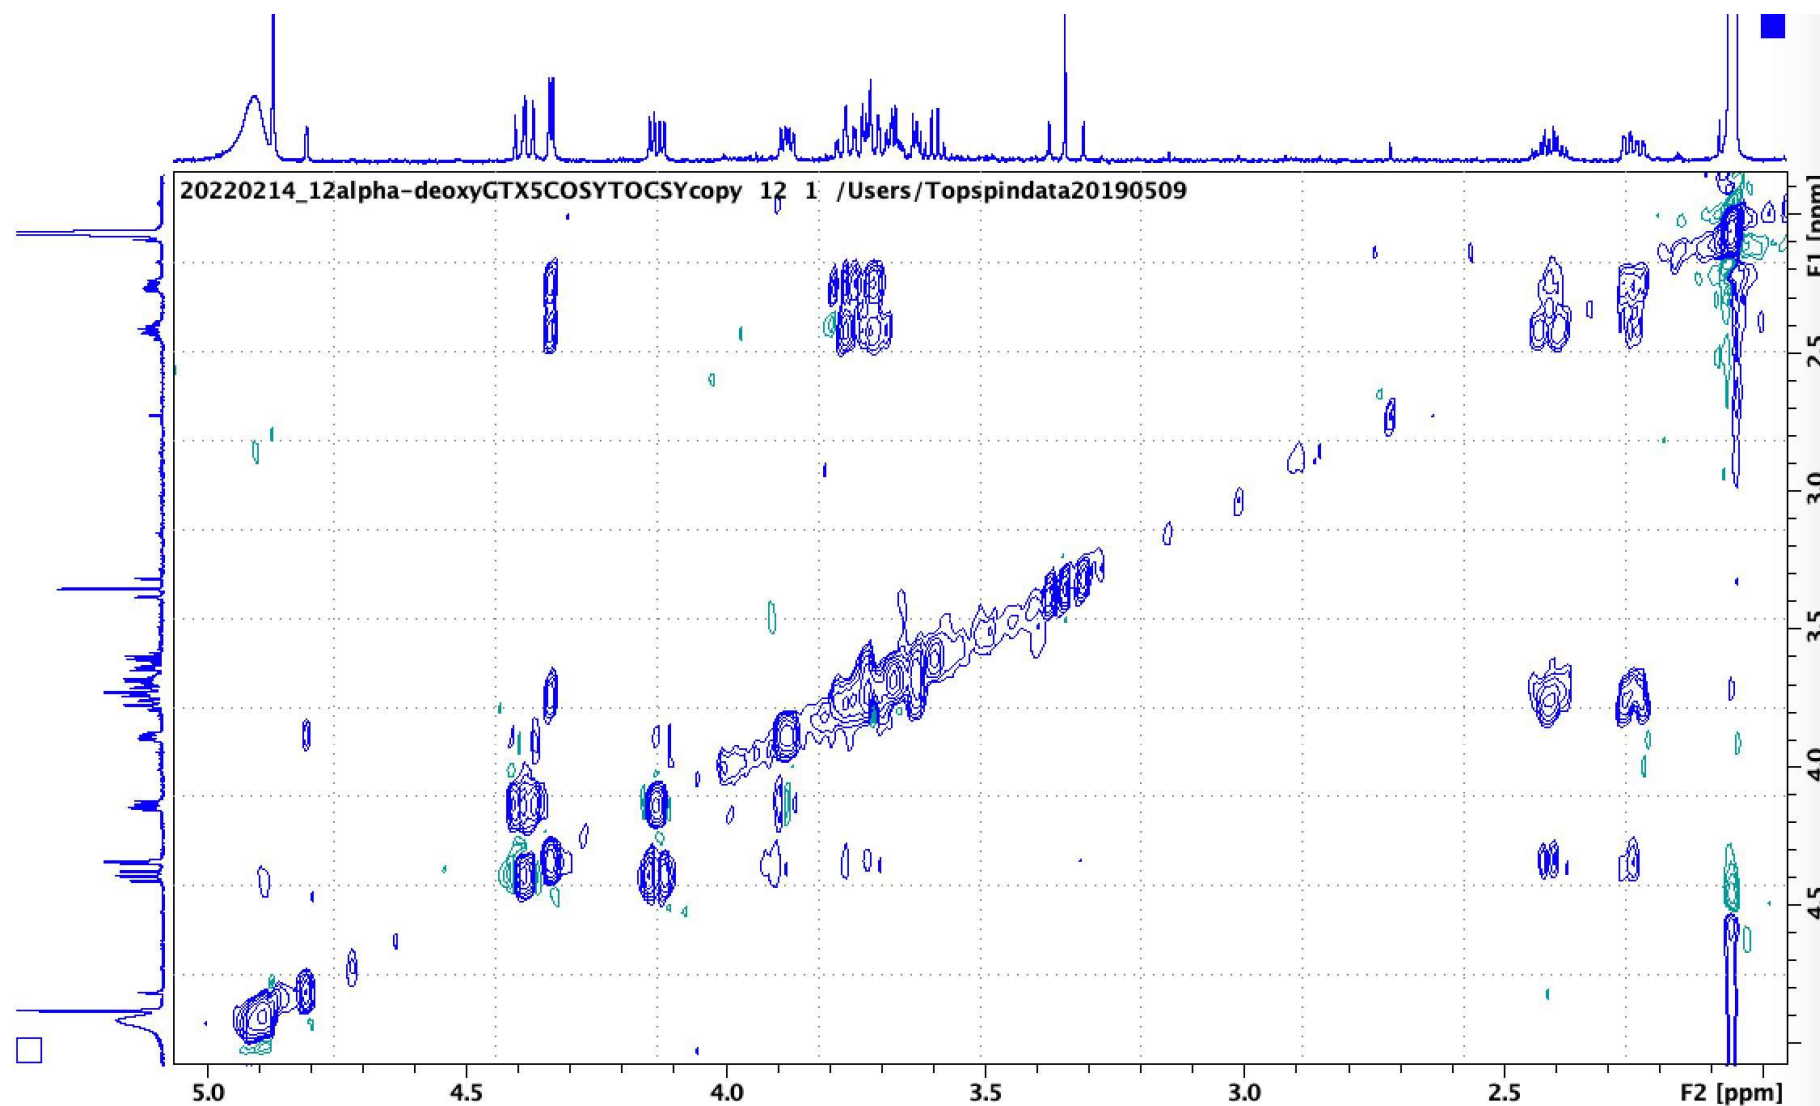

**Figure S8.** The TOCSY spectrum of synthetic 12 $\alpha$ -deoxyGTX5 (**5**). (600 MHz, microbottom tube, CD<sub>3</sub>COOD-D<sub>2</sub>O (4 : 96, v/v). HDO was presaturated. Cryoprobe, 10 min, Bruker AVANCE III)

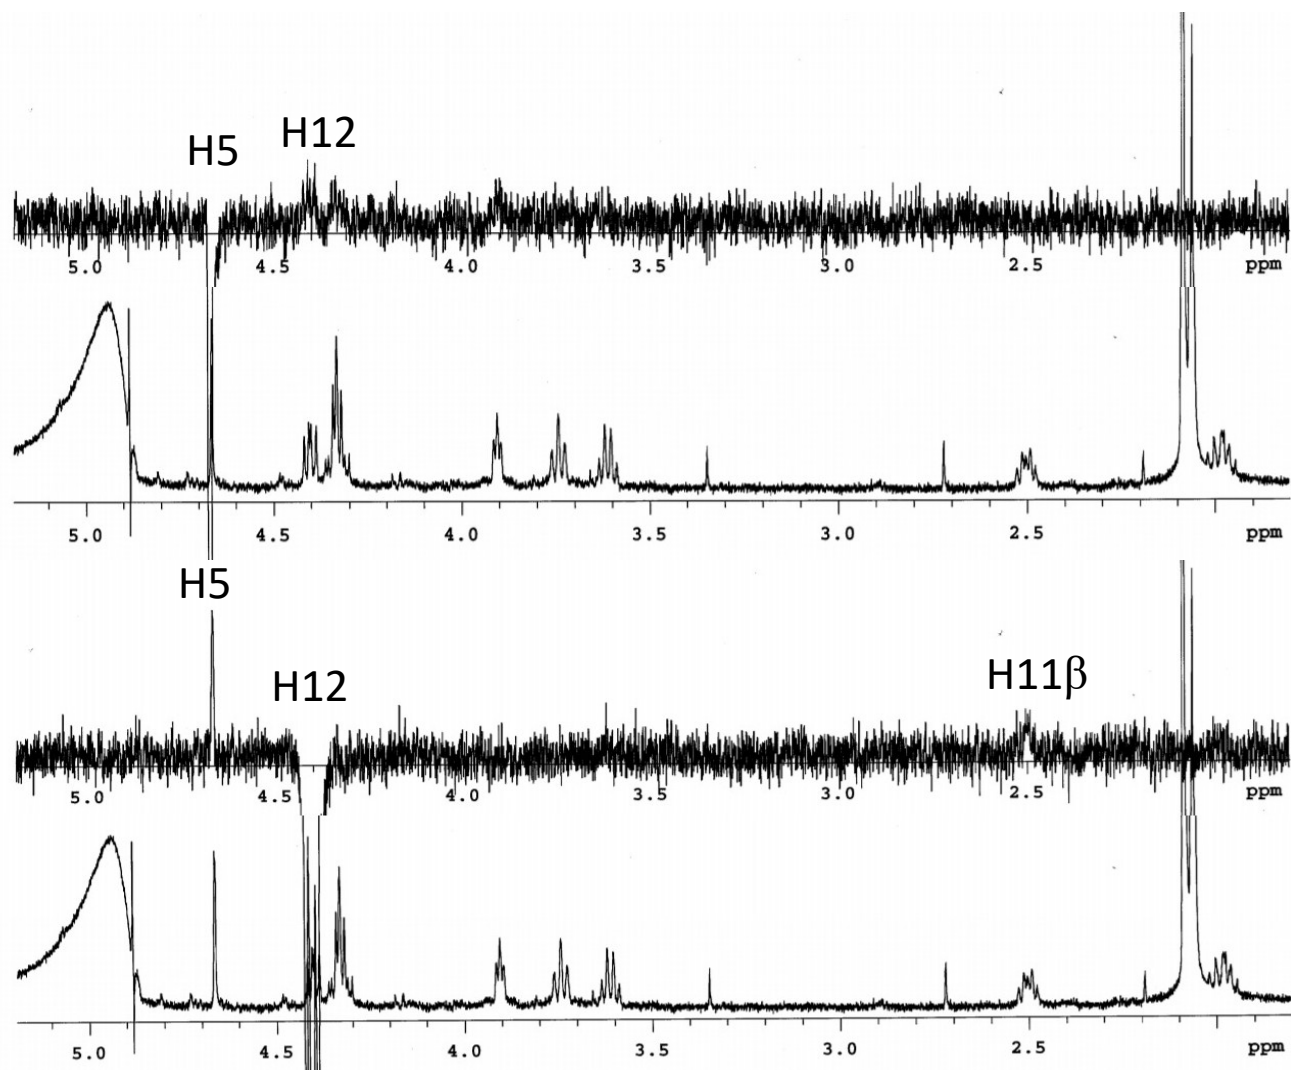

**Figure S9.** The NOESY 1D spectra of 12β-deoxyGTX5 (**2**) irradiate at  $\delta_H$  4.67 ppm (H5) and  $\delta_H$  4.40 ppm (H12) (600 MHz, CD<sub>3</sub>COOD-D<sub>2</sub>O (4 : 96, v/v)).

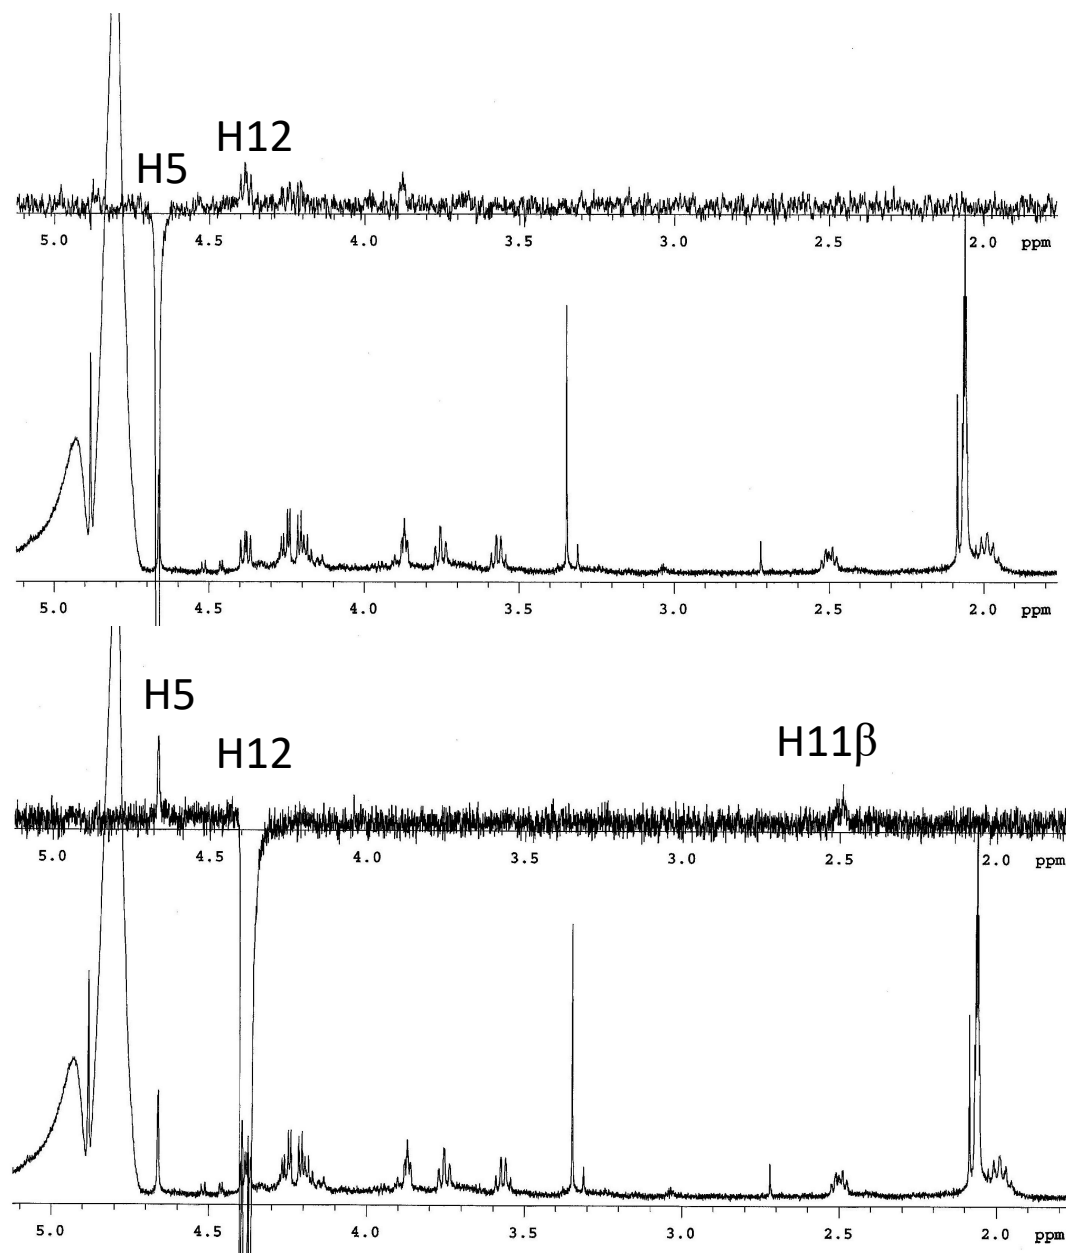

**Figure S10.** The NOESY 1D spectra of 12 $\beta$ -deoxySTX (**3**) irradiate at  $\delta_H$  4.66 ppm (H5) and  $\delta_H$  4.38 ppm (H12) (600 MHz, CD<sub>3</sub>COOD-D<sub>2</sub>O (4 : 96, v/v)).

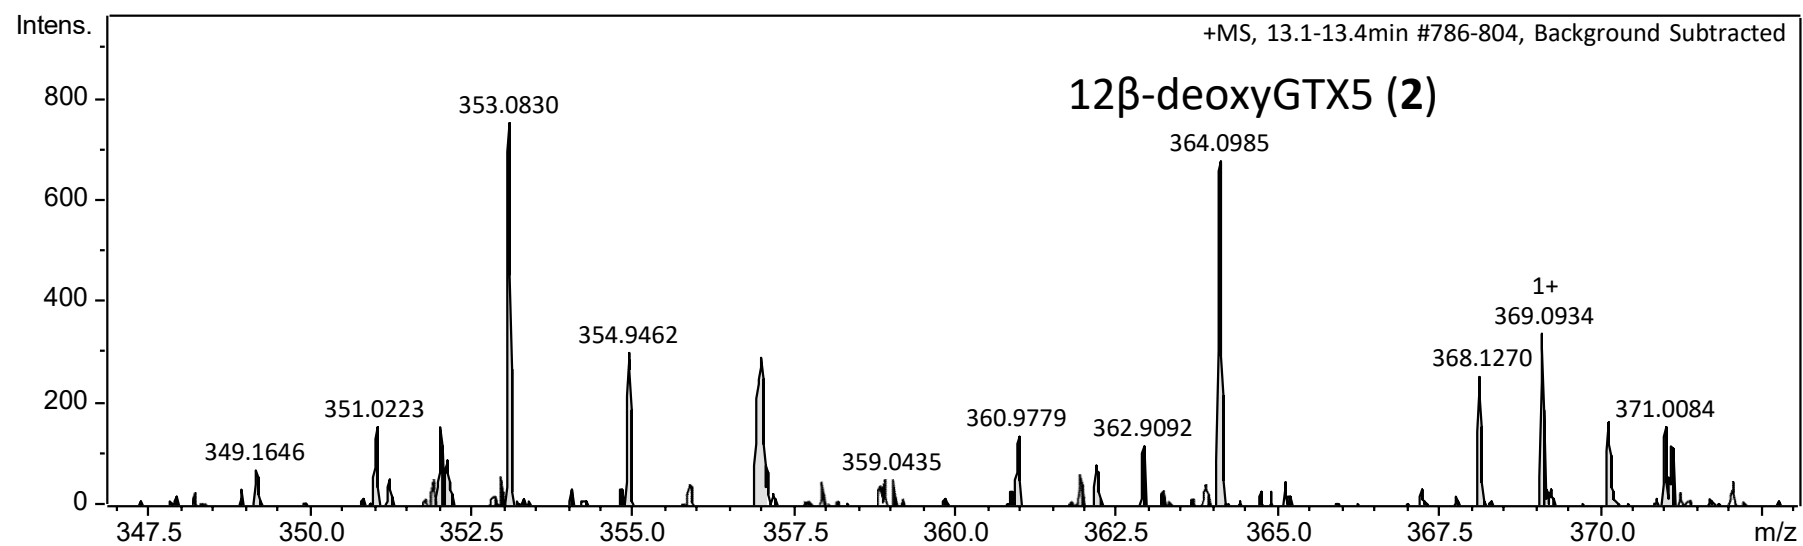

**Figure S11.** The ESI-HRMS spectrum of 12 $\beta$ -deoxyGTX5 (**2**) in *D. circinale* (TA04).

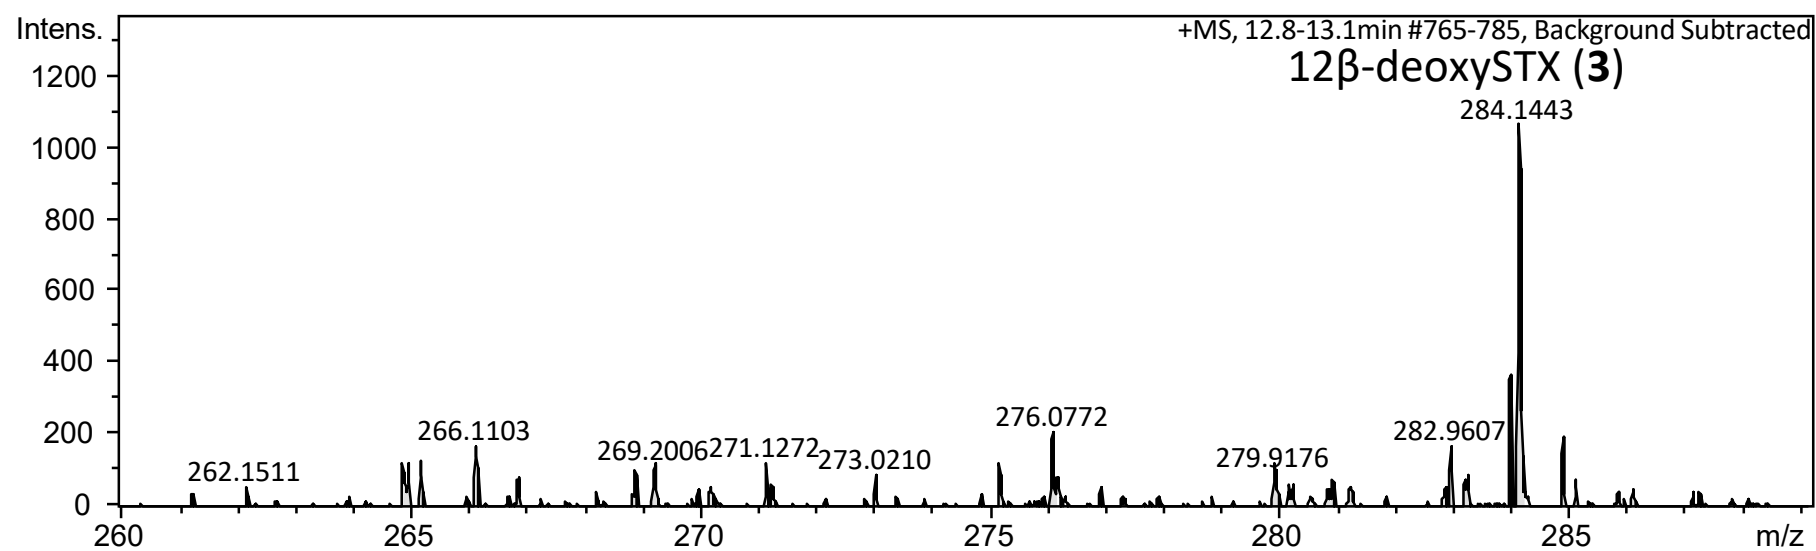

**Figure S12.** The ESI-HRMS spectrum of 12β-deoxySTX (**3**) (12α-saxitoxinol) in *D. circinale* (TA04).

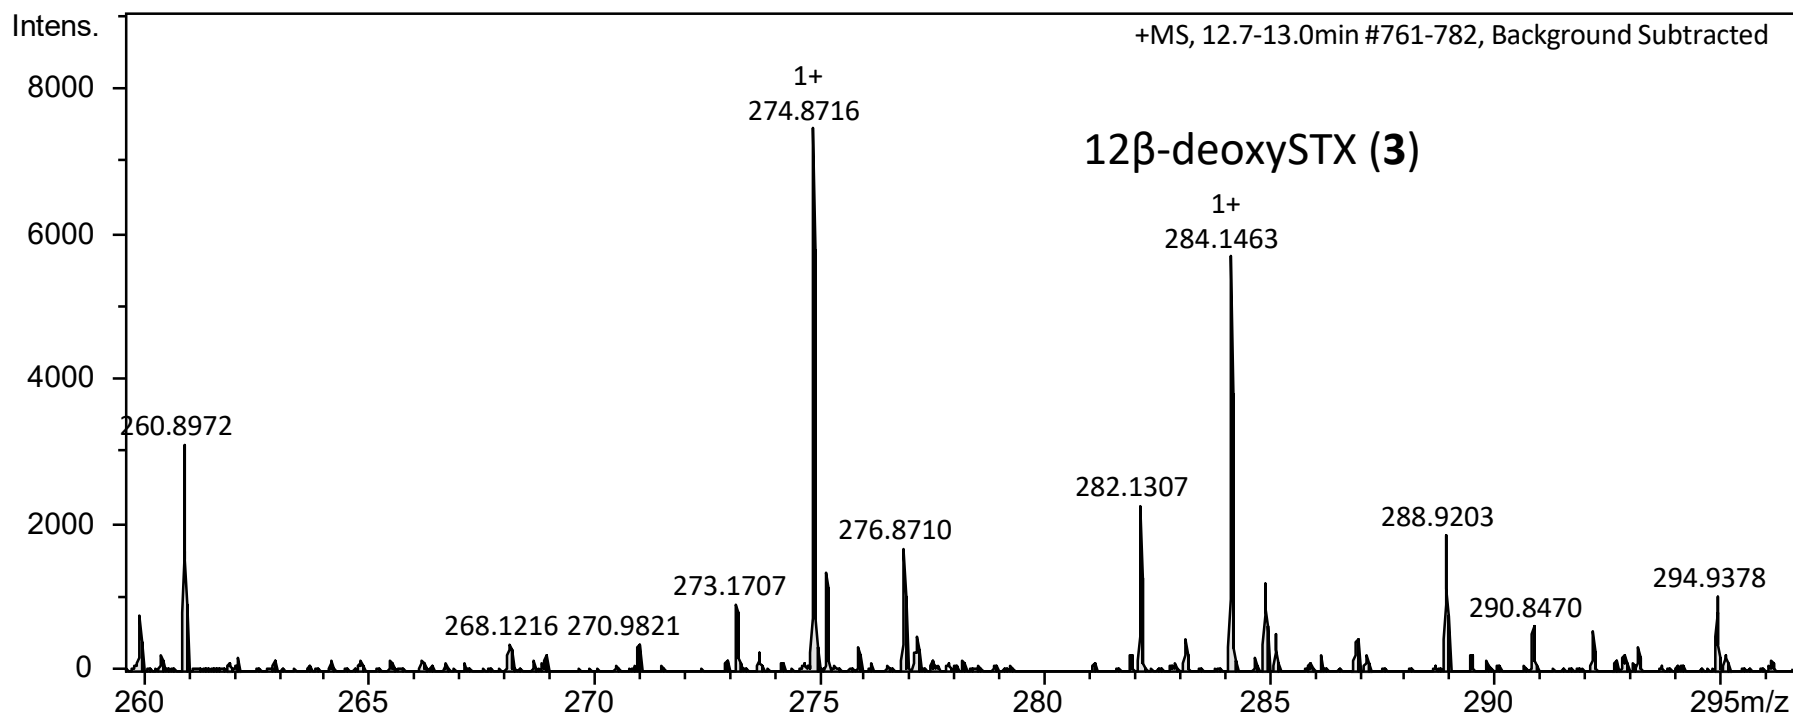

**Figure S13.** The ESI-HRMS spectrum of 12β-deoxySTX (3) (12α-saxitoxinol) in *A. pacificum* (Group IV) (Kure AC).

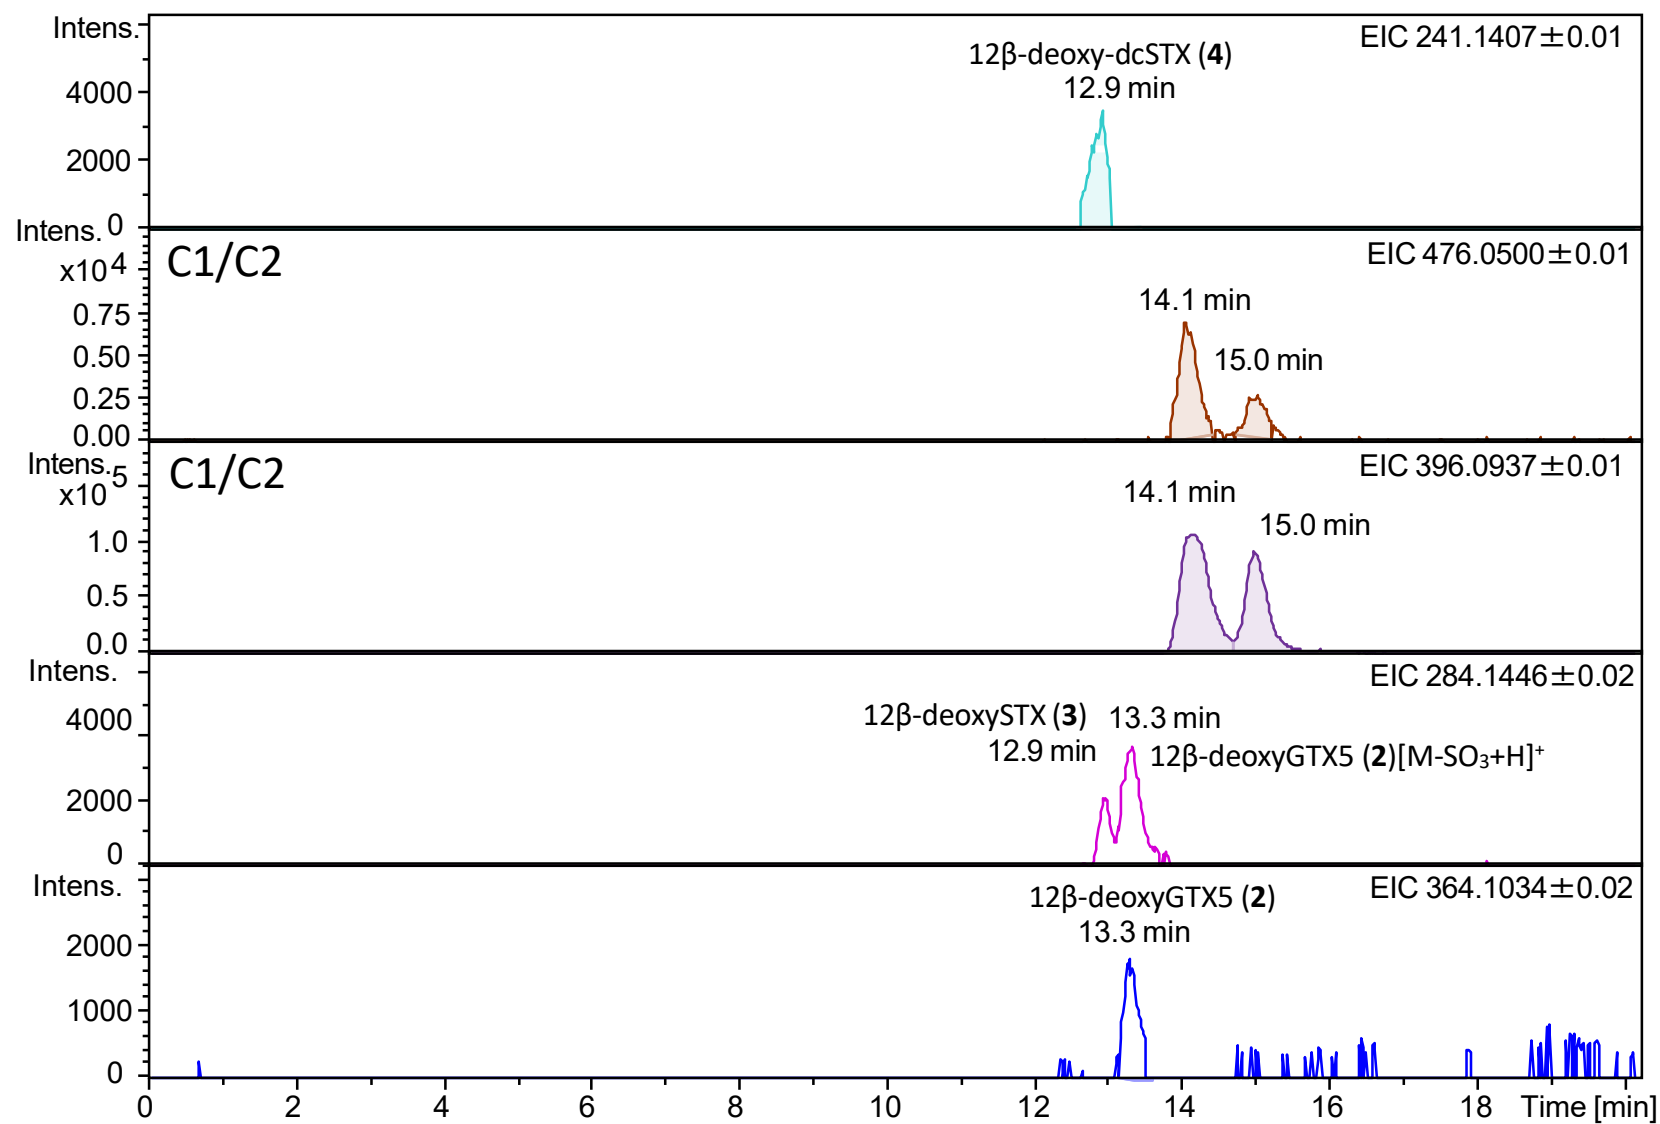

**Figure S14.** The HR-RP-LCMS Q1 scan of the *D. circinale* (TA04) cell extract. For LCMS condition, see text section 4.7.
